# Supplementary material for: Functional Innovation through Gene Duplication Followed by Frameshift Mutation
Source: Genes (Basel). 2022 Jan 21;13(2):190. doi: 10.3390/genes13020190 (PMC8872073; doi:10.3390/genes13020190)
Supplement: Supplementary file 1 [file genes-13-00190-s001.zip › Supplementary Table S1.csv]

Table S1	Summary of duplicated genes with frameshift mutations
Species	ID	Original copy	Derived copy	No. mut	Type***	Ds_C	Ls_C	Ks_C	Da_C	La_C	Ka_C	Ka_C/Ks_C	Outgroup	Expression****	Gene ID of original copy	Gene ID of derived copy******	Outgroup ID
Human	H01	MICA	MICA	1	C	0	214.9	0	2	409.1	0.005	NA	Yes	Quantitative level	ENSG00000235233.8_ENST00000418465.5	ENSG00000204520.12_ENST00000421350.1	ENSPTRT00000033163.5
Human	H02	MICA	MICA	1	C	0	263.8	0	4	558.2	0.007	NA	Yes	Quantitative level	ENSG00000235233.8_ENST00000418465.5	ENSG00000231225.9_ENST00000414473.6	ENSPTRT00000033163.5
Human	H03	MICA	MICA	2	N&C	0	145.8	0	3.9	310.2	0.013	NA	Yes	Quantitative level	ENSG00000235233.8_ENST00000418465.5	ENSG00000233051.9_ENST00000417899.5	ENSPTRT00000033163.5
Human	H04	PSORS1C1	PSORS1C1	1	C	0	40.3	0	1.1	76.7	0.014	NA	Yes	Quantitative level	ENSG00000233439.7_ENST00000420214.6	ENSG00000206458.9_ENST00000376289.6	ENSPTRT00000066839.2
Human	H05	FOXD4	FOXD4L1	1	C	1.2	271.1	0.004	10.6	589.9	0.018	4.5	Yes	Quantitative level	ENSG00000170122.5_ENST00000382500.3	ENSG00000184492.6_ENST00000306507.6	ENSMICG00000036465
Human	H06	TGIF2LX	TGIF2LY	1	C	1	150.9	0.007	1	290.1	0.003	0.429	Yes	Pattern/Quantitative level	ENSG00000153779.10_ENST00000283891.5	ENSG00000176679.8_ENST00000321217.4	ENSPCOT00000008535.1
Human	H07	FOXD4	FOXD4L6	1	C	3.4	349.8	0.01	14.6	721.2	0.02	2	Yes	Quantitative level	ENSG00000170122.5_ENST00000382500.3	ENSG00000273514.1_ENST00000622588.1 ENSG00000187559.5_ENST00000342833.3 ENSG00000204779.2_ENST00000377420.1 ENSG00000184659.5_ENST00000377413.2	ENSMICG00000036465
Human	H08	ARHGAP11A	ARHGAP11B	1	C	2	206.9	0.01	3.9	450.1	0.009	0.9	Yes	Pattern/Quantitative level	ENSG00000275568.4_ENST00000619401.4	ENSG00000187951.10_ENST00000428041.2 ENSG00000274734.1_ENST00000621228.1 ENSG00000282276.1_ENST00000633373.1	ENSPTRT00000012671.3
Human	H09	AGAP6	AGAP9	1	C	8.5	589.1	0.014	27.9	1339.9	0.021	1.444	Yes	Quantitative level	ENSG00000204149.10_ENST00000412531.3	ENSG00000204172.12_ENST00000452145.6	ENSPTRG00000029891
Human	H10	OR2T27	OR2T7	1	N	4.7	241.3	0.019	3.8	628.7	0.006	0.316	Yes	NA	ENSG00000187701.3_ENST00000344889.3	ENSG00000281395.1_ENST00000626837.1 ENSG00000281489.1_ENST00000626892.1	ENSGGOG00000003840
Human	H11	IGLJ3	IGLJ2	1	N	1	22.9	0.042	2.2	58.1	0.037	0.881	No	Pattern/Quantitative level	ENSG00000211678.2_ENST00000390324.2	ENSG00000211676.2_ENST00000390322.2	NA
Human	H12	CASTOR2	CASTOR3	1	N	5.6	122.8	0.046	4.9	240.2	0.021	0.447	No	Quantitative level	ENSG00000274070.1_ENST00000616305.1	ENSG00000239521.7_ENST00000435519.6	NA
Human	H13	ZNF578	ZNF816-ZNF321P	1	C	33.1	179.3	0.184	49	483.7	0.101	0.549	Yes	Quantitative level	ENSG00000258405.9_ENST00000601120.1	ENSG00000221874.4_ENST00000391777.3	ENSCCAG00000033386
Human	H14	KLRC4	KLRC4	1	C	23.1	113.4	0.204	61.8	309.6	0.2	0.978	Yes*	Pattern/Quantitative level	ENSG00000134545.13_ENST00000359151.7	ENSG00000183542.5_ENST00000309384.2	ENSMUST00000053708.8
Human	H15	KLRC1	KLRC4-KLRK1	1	C	23	107.2	0.214	54.2	288.8	0.188	0.874	Yes	Quantitative level	ENSG00000134545.13_ENST00000536188.5	ENSG00000255819.7_ENST00000539300.5	ENSMUST00000053708.8
Human	H16	KRTAP13-2	KRTAP23-1	1	C	10.9	35.4	0.308	9.6	78.6	0.122	0.395	No	Pattern/Quantitative level	ENSG00000182816.8_ENST00000399889.3	ENSG00000186980.6_ENST00000334160.5	NA
Human	H17	TUBA3E	TUBA4B	1	C	188.6	161.2	1.17	26.2	384.8	0.068	0.058	No	Quantitative level	ENSG00000152086.8_ENST00000312988.8	ENSG00000243910.7_ENST00000490341.2	NA
Mouse	M01	Vmn1r52	V1ra8	1	C	1	237.4	0.004	2	548.6	0.004	1	Yes	Pattern/Quantitative level	ENSMUSG00000060816.2_ENSMUST00000079832.2	ENSMUSG00000062546.4_ENSMUST00000078371.4	ENSRNOT00000086882.1
Mouse	M02	Gm8765	Gm904	1	C	1.1	65.2	0.017	4.8	192.8	0.025	1.471	Yes	Pattern/Quantitative level	ENSMUSG00000094918.3_ENSMUST00000099518.3	ENSMUSG00000096641.6_ENSMUST00000099519.1	ENSRNOT00000060670.1
Mouse	M03	Gm5786	Gm6576	1	N	5.3	246.8	0.021	10.9	536.2	0.02	0.949	Yes	Pattern/Quantitative level	ENSMUSG00000066487.3_ENSMUST00000085368.3	ENSMUSG00000090544.2_ENSMUST00000169678.2	ENSRNOT00000019508.6
Mouse	M04	Gm5786	Rps2	1	C	6.2	250.8	0.025	5	556.2	0.009	0.363	Yes	Pattern/Quantitative level	ENSMUSG00000066487.3_ENSMUST00000085368.3	ENSMUSG00000044533.15_ENSMUST00000146867.1	ENSRNOT00000019508.6
Mouse	M05	Gm8094	Gm8138	1	N	3.2	116.8	0.027	4	363.2	0.011	0.407	Yes*	Pattern/Quantitative level	ENSMUSG00000091733.1_ENSMUST00000165136.1	ENSMUSG00000096372.1_ENSMUST00000169473.1	ENSRNOT00000046644.4
Mouse	M06	6720489N17Rik	Zfp935	1	C	1.1	35.9	0.03	4	93.1	0.043	1.433	Yes	Pattern/Quantitative level	ENSMUSG00000072066.6_ENSMUST00000201563.3	ENSMUSG00000055228.7_ENSMUST00000076195.5	ENSRNOT00000061526.2
Mouse	M07	Bcl2a1d	Bcl2a1c	1	C	3.1	94.6	0.033	7.1	211.4	0.034	1.03	Yes	Pattern/Quantitative level	ENSMUSG00000099974.1_ENSMUST00000098486.3	ENSMUSG00000053820.4_ENSMUST00000066460.4	ENSRNOT00000039850.3
Mouse	M08	Gm6882	Gm4565	1	C	7.6	226.4	0.034	8.8	637.6	0.014	0.411	Yes	NA	ENSMUSG00000109516.1_ENSMUST00000177741.3	ENSMUSG00000109396.1_ENSMUST00000208134.1 ENSMUSG00000094682.2_ENSMUST00000179072.1 ENSMUSG00000096283.2_ENSMUST00000207633.1 ENSMUSG00000095190.3_ENSMUST00000179491.1 ENSMUSG00000101436.1_ENSMUST00000185914.1 ENSMUSG00000095363.2_ENSMUST00000190554.1 ENSMUSG00000109060.1_ENSMUST00000207881.1 ENSMUSG00000096283.2_ENSMUST00000178209.1 ENSMUSG00000095363.2_ENSMUST00000178591.1	ENSRNOT00000058760.2
Mouse	M09	Gm5799	4930503E14Rik	1	C	4.1	117.8	0.035	6.9	362.2	0.019	0.543	No	Pattern/Quantitative level	ENSMUSG00000091477.1_ENSMUST00000169023.1	ENSMUSG00000072595.2_ENSMUST00000100688.2	NA
Mouse	M10	Gm8104	Gm5622	1	C	5.1	105.1	0.049	24.1	314.9	0.076	1.575	Yes	Pattern/Quantitative level	ENSMUSG00000096446.1_ENSMUST00000168165.1	ENSMUSG00000079244.3_ENSMUST00000096170.4	ENSRNOT00000042743.5
Mouse	M11	Gm17190	Gm6793	1	N	13.6	230.1	0.059	38.2	621.9	0.061	1.037	No	Pattern/Quantitative level	ENSMUSG00000099115.1_ENSMUST00000185178.1	ENSMUSG00000092086.1_ENSMUST00000071732.5	NA
Mouse	M12	Rps4x	Gm15013	1	C	14.2	210.6	0.067	11.2	545.4	0.021	0.305	Yes	Pattern/Quantitative level	ENSMUSG00000031320.9_ENSMUST00000033683.7	ENSMUSG00000098559.1_ENSMUST00000183728.1	ENSRNOT00000076978.3
Mouse	M13	Rpl9-ps6	Rpl9-ps1	3	M	13.5	155.1	0.087	13.5	360.9	0.037	0.43	Yes	Pattern/Quantitative level	ENSMUSG00000062456.3_ENSMUST00000078034.3	ENSMUSG00000081906.2_ENSMUST00000182502.1	ENSRNOT00000052231.4
Mouse	M14	9230110F15Rik	Gm5916	1	C	5.7	64.1	0.089	8	187.9	0.042	0.474	Yes	Pattern/Quantitative level	ENSMUSG00000047980.6_ENSMUST00000054175.6	ENSMUSG00000091411.1_ENSMUST00000168452.1	ENSRNOT00000032208.3
Mouse	M15	Gm11214	Gm15294	1	C	6.2	67.4	0.092	14.1	151.6	0.093	1.007	No	Pattern/Quantitative level	ENSMUSG00000099294.1_ENSMUST00000184252.1	ENSMUSG00000081607.2_ENSMUST00000182079.1	NA
Mouse	M16	Obox7	Obox2	1	C	6.9	72.8	0.095	16.5	272.2	0.061	0.642	Yes	Pattern/Quantitative level	ENSMUSG00000055942.13_ENSMUST00000183788.7	ENSMUSG00000074369.12_ENSMUST00000174305.7	ENSRNOT00000045660.2
Mouse	M17	Gm21897	Gm21962	1	C	22.6	209.4	0.108	19.1	747.6	0.025	0.236	Yes	Pattern/Quantitative level	ENSMUSG00000094472.1_ENSMUST00000178312.1	ENSMUSG00000094856.1_ENSMUST00000166899.2	ENSRNOT00000091672.1
Mouse	M18	Lipo3	Lipo5	2	M	17.5	146.9	0.119	30.2	483.1	0.062	0.526	Yes	Pattern/Quantitative level	ENSMUSG00000024766.14_ENSMUST00000025694.6	ENSMUSG00000086875.1_ENSMUST00000156818.1	ENSRNOT00000035013.4
Mouse	M19	Gm49368	Rpl35	1	C	4.9	40.3	0.121	5	94.7	0.052	0.43	No	Pattern/Quantitative level	ENSMUSG00000108596.1_ENSMUST00000134694.1	ENSMUSG00000062997.6_ENSMUST00000080861.5	NA
Mouse	M20	Rex2	Zfp980	1	C	60.7	387.9	0.157	104.6	1514.1	0.069	0.442	Yes	Pattern/Quantitative level	ENSMUSG00000067919.8_ENSMUST00000075775.5	ENSMUSG00000058186.13_ENSMUST00000180014.1	ENSRNOT00000081537.1
Mouse	M21	Vmn1r214	Vmn1r212	1	C	43.8	263.8	0.166	82.5	639.2	0.129	0.776	No	Pattern/Quantitative level	ENSMUSG00000061829.3_ENSMUST00000074252.3	ENSMUSG00000071490.3_ENSMUST00000095960.3	NA
Mouse	M22	Vmn1r214**	Vmn1r213	1	N	45.5	262.9	0.173	60.3	646.1	0.093	0.54	No	Pattern/Quantitative level	ENSMUSG00000061829.3_ENSMUST00000074252.3	ENSMUSG00000060024.1_ENSMUST00000076897.1	NA
Mouse	M23	Zfp984	Zfp982	1	C	40	218.2	0.183	119.1	837.8	0.142	0.775	Yes	Pattern/Quantitative level	ENSMUSG00000078495.10_ENSMUST00000105734.9	ENSMUSG00000078496.9_ENSMUST00000063704.7	ENSRNOT00000034746.6
Mouse	M24	Vmn1r205	Vmn1r203	1	C	45.3	244.7	0.185	44.5	655.3	0.068	0.367	Yes	Pattern/Quantitative level	ENSMUSG00000100296.1_ENSMUST00000185475.1	ENSMUSG00000069289.1_ENSMUST00000091729.1	MGP_PahariEiJ_T0040451.1
Mouse	M25	Gm8888	Rpl36-ps4	3	N&M	13.1	63.8	0.206	15.6	155.2	0.101	0.49	No	Pattern/Quantitative level	ENSMUSG00000095638.1_ENSMUST00000177677.1	ENSMUSG00000093922.1_ENSMUST00000179601.1	NA
Mouse	M26	Igkv14-100	Gm17472	1	C	17.9	86.3	0.208	26.8	222.7	0.12	0.579	Yes	Pattern/Quantitative level	ENSMUSG00000096515.5_ENSMUST00000199510.4	ENSMUSG00000091008.1_ENSMUST00000167638.1	ENSRNOT00000087773.1
Mouse	M27	Pcdhb9	Pcdhb7	3	M	161.4	704.4	0.229	111	1710.6	0.065	0.283	Yes	Pattern/Quantitative level	ENSMUSG00000051242.1_ENSMUST00000057228.1	ENSMUSG00000045062.4_ENSMUST00000053037.4	ENSMOCT00000026210.1
Mouse	M28	Frat1	Frat3	1	C	60.1	246.1	0.244	38	509.9	0.075	0.305	Yes	Pattern/Quantitative level	ENSMUSG00000067199.4_ENSMUST00000087155.4	ENSMUSG00000070526.2_ENSMUST00000094339.2	ENSNGAT00000028350.1
Mouse	M29	Sprr2j-ps	Sprr2f	1	C	5.2	18.9	0.277	3.5	38.1	0.091	0.329	No	Pattern/Quantitative level	ENSMUSG00000027925.2_ENSMUST00000029533.2	ENSMUSG00000050635.1_ENSMUST00000050397.1 ENSMUSG00000055030.1_ENSMUST00000068399.1	NA
Mouse	M30	Acta2	Gm17087	1	C	134.5	117.5	1.145	27.2	275.5	0.099	0.086	No	Pattern/Quantitative level	ENSMUSG00000035783.8_ENSMUST00000039631.8	ENSMUSG00000099104.1_ENSMUST00000184183.1	NA
Zebrafish	Z01	si:ch211-76m11.7	si:ch211-127n13.2	2	C	0	95.2	0	0	315.8	0	NA	No	Pattern/Quantitative level	ENSDARG00000099789.1_ENSDART00000158076.1	ENSDARG00000095189.1_ENSDART00000135759.1	NA
Zebrafish	Z02	si:dkey-62k3.5	NA	1	N	0	32.2	0	4.1	153.8	0.027	NA	Yes	Pattern/Quantitative level	ENSDARG00000090975.3_ENSDART00000173980.1	ENSDARG00000103701.1_ENSDART00000164831.1	XP_025757774.1
Zebrafish	Z03	si:rp71-23d18.4	si:ch211-249c2.1	1	N	0	142.5	0	12.1	394.5	0.031	NA	No	Pattern/Quantitative level	ENSDARG00000092779.1_ENSDART00000142882.1	ENSDARG00000102941.1_ENSDART00000165813.1	NA
Zebrafish	Z04	si:ch211-108d22.1	si:ch211-134c9.2	1	N	1	42.9	0.024	3	98.1	0.03	1.25	Yes	Pattern/Quantitative level	ENSDARG00000097099.1_ENSDART00000154470.1	ENSDARG00000095593.1_ENSDART00000137138.1	XP_018956261.1
Zebrafish	Z05	si:dkey-151g22.1	Si:rp71-7l19.2	1	N	4.8	161.3	0.03	8.3	471.7	0.018	0.6	Yes	Pattern/Quantitative level	ENSDARG00000102028.1_ENSDART00000123408.2	ENSDARG00000102853.1_ENSDART00000064309.3	XP_018942195.1
Zebrafish	Z06	HTRA2	HTRA2	1	C	4.1	127.4	0.032	6.9	406.6	0.017	0.531	Yes	Pattern/Quantitative level	ENSDARG00000092625.2_ENSDART00000132116.2	ENSDARG00000092202.2_ENSDART00000164973.1	ENSIPUT00000009250.1
Zebrafish	Z07	HTRA2	si:dkey-84o3.6	1	C	5.3	148.4	0.036	6.8	343.6	0.02	0.554	Yes	Pattern/Quantitative level	ENSDARG00000095545.2_ENSDART00000147176.1	ENSDARG00000094878.2_ENSDART00000134520.2	ENSIPUT00000009250.1
Zebrafish	Z08	NA	NA	1	N	5	137.5	0.036	22.5	453.5	0.05	1.359	Yes*	Pattern/Quantitative level	ENSDARG00000074279.1_ENSDART00000078640.2	ENSDARG00000078586.3_ENSDART00000111467.3	CI01000026_05016210_05017522
Zebrafish	Z09	si:dkey-112g5.16	si:dkey-112g5.12	1	N	7	162.1	0.043	7.2	365.9	0.02	0.452	Yes	Pattern/Quantitative level	ENSDARG00000095444.1_ENSDART00000131264.1	ENSDARG00000093963.2_ENSDART00000143783.2	ENSIPUT00000009250.1
Zebrafish	Z10	si:dkey-93l1.6	si:dkey-80c24.4	2	M	8.5	161	0.053	62.2	388	0.16	3.042	Yes	Pattern/Quantitative level	ENSDARG00000092512.1_ENSDART00000143001.1	ENSDARG00000093579.1_ENSDART00000146880.1	XP_018949576.1
Zebrafish	Z11	si:dkey-62k3.5	NA	1	N	3.8	62.6	0.06	6.5	201.4	0.032	0.533	Yes	Pattern/Quantitative level	ENSDARG00000090975.3_ENSDART00000173980.1	ENSDARG00000099246.1_ENSDART00000169655.1	XP_025757774.1
Zebrafish	Z12	si:dkey-58f10.13	si:dkey-58f10.14	1	C	6.5	87.6	0.074	10.8	347.4	0.031	0.42	No	Pattern/Quantitative level	ENSDARG00000095532.1_ENSDART00000136949.1	ENSDARG00000095026.1_ENSDART00000144473.1	NA
Zebrafish	Z13	si:dkey-93l1.6	si:dkeyp-67e1.3	1	C	16.2	198	0.082	59.8	492	0.121	1.484	Yes	Pattern/Quantitative level	ENSDARG00000092512.1_ENSDART00000143001.1	ENSDARG00000091890.1_ENSDART00000134166.1	XP_018949576.1
Zebrafish	Z14	zgc:123103	si:zfos-1897c11.1	1	N	22.4	206	0.109	16.1	526	0.031	0.281	Yes	Pattern/Quantitative level	ENSDARG00000099200.1_ENSDART00000162837.1	ENSDARG00000077910.4_ENSDART00000160532.1	ENSIPUT00000032654.1
Zebrafish	Z15	si:ch211-152f2.3	si:ch211-1f22.12	1	C	23.9	207.8	0.115	75.5	656.2	0.115	1.002	Yes	Pattern/Quantitative level	ENSDARG00000043445.5_ENSDART00000035575.6	ENSDARG00000093845.3_ENSDART00000152711.1	XP_016119820.1
Zebrafish	Z16	si:dkey-6a5.3	si:dkey-234l24.8	1	C	5.3	45.6	0.115	10.7	119.4	0.09	0.781	No	Pattern/Quantitative level	ENSDARG00000094001.3_ENSDART00000171451.1	ENSDARG00000093588.1_ENSDART00000147061.1	NA
Zebrafish	Z17	RNF14	RNF14	1	C	28.5	245.8	0.116	32.6	654.2	0.05	0.43	Yes	Pattern/Quantitative level	ENSDARG00000104631.1_ENSDART00000165571.1	ENSDARG00000078683.3_ENSDART00000112698.3	ENSIPUT00000017639.1
Zebrafish	Z18	si:dkey-6a5.3	si:dkey-234l24.1	2	C	5.1	43	0.119	9.7	122	0.08	0.666	No	Pattern/Quantitative level	ENSDARG00000094001.3_ENSDART00000171451.1	ENSDARG00000094329.1_ENSDART00000138656.1 ENSDARG00000092409.1_ENSDART00000142487.1	NA
Zebrafish	Z19	zgc:172106	si:ch211-286b5.8	1	C	24.9	191.7	0.13	45.4	582.3	0.078	0.599	No	Pattern/Quantitative level	ENSDARG00000017984.10_ENSDART00000128979.2	ENSDARG00000096625.1_ENSDART00000152352.1	NA
Zebrafish	Z20	si:ch211-214k5.3	si:ch211-214k5.3	2	C	6.9	44.1	0.156	20.5	162.9	0.126	0.805	Yes	Pattern/Quantitative level	ENSDARG00000043894.5_ENSDART00000064459.5	ENSDARG00000102034.1_ENSDART00000037303.5	XP_016341397.1
Zebrafish	Z21	ftr72	ftr90	1	N	53.8	323.3	0.167	89.3	924.7	0.097	0.58	Yes	Pattern/Quantitative level	ENSDARG00000026704.6_ENSDART00000099302.3	ENSDARG00000097373.2_ENSDART00000154230.2	XP_016407654.1
Zebrafish	Z22	fhit	si:ch211-63i20.3	1	C	14.4	86.4	0.167	6.9	207.6	0.033	0.2	Yes	Pattern/Quantitative level	ENSDARG00000078195.2_ENSDART00000110845.2	ENSDARG00000104993.2_ENSDART00000159425.2	XP_018967896.1
Zebrafish	Z23	clca1	si:ch211-116o3.3	1	C	29.9	173	0.173	56	475	0.118	0.682	Yes	Pattern/Quantitative level	ENSDARG00000100941.1_ENSDART00000159757.1	ENSDARG00000086498.3_ENSDART00000154635.1	CI01000308_00041387_00048067
Zebrafish	Z24	CR391991.1	CR391991.5	1	C	23.4	127.7	0.183	66.4	385.3	0.172	0.941	No	Pattern/Quantitative level	ENSDARG00000102866.1_ENSDART00000160132.1	ENSDARG00000105247.1_ENSDART00000158839.1	NA
Zebrafish	Z25	si:dkey-103d23.3	si:busm1-105l16.2	2	M	17.4	93.9	0.185	19.8	266.1	0.074	0.402	Yes	Pattern/Quantitative level	ENSDARG00000095057.2_ENSDART00000141318.1	ENSDARG00000070858.4_ENSDART00000158955.1 ENSDARG00000043735.6_ENSDART00000064221.4 ENSDARG00000074395.2_ENSDART00000101794.3	XP_016375730.1
Zebrafish	Z26	si:ch211-272b8.7	si:zfos-754c12.2	1	N	45	213	0.211	102.1	609	0.168	0.794	No	Pattern/Quantitative level	ENSDARG00000097997.1_ENSDART00000157196.1	ENSDARG00000089747.3_ENSDART00000153010.1	NA
Zebrafish	Z27	si:ch211-132b12.3	si:ch211-132b12.4	1	N	23.7	88.5	0.268	22.8	214.5	0.106	0.397	Yes	Pattern/Quantitative level	ENSDARG00000068363.5_ENSDART00000167002.1	ENSDARG00000092930.1_ENSDART00000146262.1	CI01000028_05937526_05949610
Zebrafish	Z28	zgc:113030	si:ch211-110e21.4	1	C	56.8	134.3	0.423	55.2	384.7	0.143	0.339	No	Pattern/Quantitative level	ENSDARG00000069869.3_ENSDART00000080437.4	ENSDARG00000103341.1_ENSDART00000102030.3	NA
Zebrafish	Z29	CR855320.1	BX546500.1	1	C	684.1	1160.7	0.589	240	2817.3	0.085	0.145	Yes*	Pattern/Quantitative level	ENSDARG00000099359.1_ENSDART00000159655.1	ENSDARG00000086495.2_ENSDART00000122176.2	KKF19921.1
Zebrafish	Z30	actn3b	zgc:165653	1	C	80.7	90.6	0.89	24.9	266.4	0.093	0.105	Yes	Pattern/Quantitative level	ENSDARG00000001431.10_ENSDART00000001649.9	ENSDARG00000104713.1_ENSDART00000168441.1	ENSEBUT00000022154.1
Zebrafish	Z31	zgc:165555	si:dkey-23a13.12	1	C	20.3	22.4	0.907	3.2	55.6	0.058	0.064	Yes	Pattern/Quantitative level	ENSDARG00000101249.2_ENSDART00000110813.3	ENSDARG00000105342.1_ENSDART00000172959.1	ENSTNIG0000000877
Fruitfly	F01	CSNK2B	CSNK2B	2	M	0	112	0	0.9	338	0.003	NA	Yes	Pattern/Quantitative level	FBgn0053236	FBgn0053242	KMQ81491.1
Fruitfly	F02	NA	NA	1	C	8.4	142.6	0.059	15.5	337.4	0.046	0.778	Yes	Pattern/Quantitative level	FBgn0262610	FBgn0262575	FBgn0167536
Yes* in the Outgroup column means that an outgroup sequence was obtained and used to determine the original and derived copies, but not used for sequence analyses because of poor alignment.
Ds_C	Number of synonymous differences in the common frame region
Ls_C	Number of synonymous sites in the common frame region
Ks_C	Ks (per-site divergence) in the common frame region
Da_C	Number of nonsynonymous differences in the common frame region
La_C	Number of nonsynonymous sites in the common frame region
Ka_C	Ka (per-site divergence) in the common frame region
** This is an exceptional case where the shorter copy (Vmn1r213) is considered ancestral even with no outgroup because Vmn1r214 is also the ancestral copy for the case of M21
*** "C", "M", and "N" mean that frameshift changes the reading frame in the C-terminus, middle region, and N-terminus of the amino-acid sequence of a gene, respectively.
*****Showing tissue-specific expression divergence/only quantitative level expression divergence between duplicates with frameshift mutation.
******In some cases, multiple genes were identified as derived copies.
