# Supplementary material for: Functional Innovation through Gene Duplication Followed by Frameshift Mutation
Source: Genes (Basel). 2022 Jan 21;13(2):190. doi: 10.3390/genes13020190 (PMC8872073; doi:10.3390/genes13020190)
Supplement: Supplementary file 1 [file genes-13-00190-s001.zip › Supplementary Table S2.csv]

Table S2	Summary of sequence analyses
Species	newID	Original copy	Derived copy	Type	Ds_CO	Ds_CD	Ls_C	Da_CO	Da_CD	La_C	Ds_FO	Ds_FD	Ls_F	Da_FO	Da_FD	La_F	Outgroup species	Gene ID of original copy	Gene ID of derived copy	Outgroup ID
Human	H01	MICA	MICA	C	0	0	182	0	2	406	0	0	5	0	0	26.6	Pan troglodytes	ENSG00000235233.8_ENST00000418465.5	ENSG00000204520.12_ENST00000421350.1	ENSPTRT00000033163.5
Human	H02	MICA	MICA	C	0	0	250.6	1.9	2	535.4	0	0	5	0	0	26.6	Pan troglodytes	ENSG00000235233.8_ENST00000418465.5	ENSG00000231225.9_ENST00000414473.6	ENSPTRT00000033163.5
Human	H03	MICA	MICA	N&C	0	0	133	1.9	2	287	0	0	21.6	0	0	86.4	Pan troglodytes	ENSG00000235233.8_ENST00000418465.5	ENSG00000233051.9_ENST00000417899.5	ENSPTRT00000033163.5
Human	H04	PSORS1C1	PSORS1C1	C	0	0	31.3	0	1.1	76.7	0	0	18.2	0	0	52.2	Pan troglodytes	ENSG00000233439.7_ENST00000420214.6	ENSG00000206458.9_ENST00000376289.6	ENSPTRT00000066839.2
Human	H06	TGIF2LX	TGIF2LY	C	0	1	129.8	0	1	302.2	0	0	30.6	0	0	80.4	Propithecus coquereli	ENSG00000153779.10_ENST00000283891.5	ENSG00000176679.8_ENST00000321217.4	ENSPCOT00000008535.1
Human	H08	ARHGAP11A	ARHGAP11B	C	1	1	193.8	1	2.9	463.2	0	0	30.8	0	2	110.2	Pan troglodytes	ENSG00000275568.4_ENST00000619401.4	ENSG00000187951.10_ENST00000428041.2 ENSG00000274734.1_ENST00000621228.1 ENSG00000282276.1_ENST00000633373.1	ENSPTRT00000012671.3
Human	H09	AGAP6	AGAP9	C	3.2	5.3	564.2	13.7	12.8	1289.8	0	0	14.6	0	0	30.4	Pan troglodytes	ENSG00000204149.10_ENST00000412531.3	ENSG00000204172.12_ENST00000452145.6	ENSPTRG00000029891
Human	H10	OR2T27	OR2T7	N	1.2	3.5	241.2	1.9	1.9	628.8	0	0	15.8	0	0	35.2	Gorilla gorilla	ENSG00000187701.3_ENST00000344889.3	ENSG00000281395.1_ENST00000626837.1 ENSG00000281489.1_ENST00000626892.1	ENSGGOG00000003840
Human	H13	ZNF578	ZNF816-ZNF321P	C	14	10.1	155.8	20.8	16.9	411.2	0	0	6.4	0	0	25.2	Cebus capucinus imitator	ENSG00000258405.9_ENST00000601120.1	ENSG00000221874.4_ENST00000391777.3	ENSCCAG00000033386
Mouse	M01	Vmn1r52	V1ra8	C	0	1	205.5	0	2	577.5	0	0	11.6	2.1	0	34.8	Rattus norvegicus	ENSMUSG00000060816.2_ENSMUST00000079832.2	ENSMUSG00000062546.4_ENSMUST00000078371.4	ENSRNOT00000086882.1
Mouse	M02	Gm8765	Gm904	C	1.1	0	62.8	2.9	1.9	195.2	0	0	6.9	0	1.1	30.6	Rattus norvegicus	ENSMUSG00000094918.3_ENSMUST00000099518.3	ENSMUSG00000096641.6_ENSMUST00000099519.1	ENSRNOT00000060670.1
Mouse	M03	Gm5786	Gm6576	N	4.2	1.1	253.3	2	6.9	523.7	0.5	1.5	10.6	0	0	20.8	Rattus norvegicus	ENSMUSG00000066487.3_ENSMUST00000085368.3	ENSMUSG00000090544.2_ENSMUST00000169678.2	ENSRNOT00000019508.6
Mouse	M04	Gm5786	Rps2	C	4.1	1	238	4	1	566	0	0	21.2	0	0	49.3	Rattus norvegicus	ENSMUSG00000066487.3_ENSMUST00000085368.3	ENSMUSG00000044533.15_ENSMUST00000146867.1	ENSRNOT00000019508.6
Mouse	M06	6720489N17Rik	Zfp935	C	1	0	34.1	3.1	0	88.9	4.2	0	35	3	0	142	Rattus norvegicus	ENSMUSG00000072066.6_ENSMUST00000201563.3	ENSMUSG00000055228.7_ENSMUST00000076195.5	ENSRNOT00000061526.2
Mouse	M07	Bcl2a1d	Bcl2a1c	C	0	3.1	85	0	7.1	221	0	0	20.2	0	2.9	54.8	Rattus norvegicus	ENSMUSG00000099974.1_ENSMUST00000098486.3	ENSMUSG00000053820.4_ENSMUST00000066460.4	ENSRNOT00000039850.3
Mouse	M08	Gm6882	Gm4565	C	2.2	0	181.2	3.9	2.9	604.8	0	0	9	1	0	27	Rattus norvegicus	ENSMUSG00000109516.1_ENSMUST00000177741.3	ENSMUSG00000109396.1_ENSMUST00000208134.1 ENSMUSG00000094682.2_ENSMUST00000179072.1 ENSMUSG00000096283.2_ENSMUST00000207633.1 ENSMUSG00000095190.3_ENSMUST00000179491.1 ENSMUSG00000101436.1_ENSMUST00000185914.1 ENSMUSG00000095363.2_ENSMUST00000190554.1 ENSMUSG00000109060.1_ENSMUST00000207881.1 ENSMUSG00000096283.2_ENSMUST00000178209.1 ENSMUSG00000095363.2_ENSMUST00000178591.1	ENSRNOT00000058760.2
Mouse	M10	Gm8104	Gm5622	C	2	0	64.1	13.2	0	262.9	0	0	5.7	0	0	18.3	Rattus norvegicus	ENSMUSG00000096446.1_ENSMUST00000168165.1	ENSMUSG00000079244.3_ENSMUST00000096170.4	ENSRNOT00000042743.5
Mouse	M12	Rps4x	Gm15013	C	5	8.8	215.4	0	11.3	540.6	0	0	8.4	0	0	21.6	Rattus norvegicus	ENSMUSG00000031320.9_ENSMUST00000033683.7	ENSMUSG00000098559.1_ENSMUST00000183728.1	ENSRNOT00000076978.3
Mouse	M13	Rpl9-ps6	Rpl9-ps1	M	9.3	3	151	1	12.3	362	0	0	13.7	0	1.1	38.8	Rattus norvegicus	ENSMUSG00000062456.3_ENSMUST00000078034.3	ENSMUSG00000081906.2_ENSMUST00000182502.1	ENSRNOT00000052231.4
Mouse	M14	9230110F15Rik	Gm5916	C	4.5	0	60.5	3.9	0	173.5	0	0	12.1	0	0	29.9	Rattus norvegicus	ENSMUSG00000047980.6_ENSMUST00000054175.6	ENSMUSG00000091411.1_ENSMUST00000168452.1	ENSRNOT00000032208.3
Mouse	M16	Obox7	Obox2	C	0	2.3	58.5	2	6.1	253.5	1.1	0	23	2.1	1	70	Rattus norvegicus	ENSMUSG00000055942.13_ENSMUST00000183788.7	ENSMUSG00000074369.12_ENSMUST00000174305.7	ENSRNOT00000045660.2
Mouse	M17	Gm21897	Gm21962	C	2	9.3	178.4	4	9.9	724.6	0	0	9.6	0	0	41.4	Rattus norvegicus	ENSMUSG00000094472.1_ENSMUST00000178312.1	ENSMUSG00000094856.1_ENSMUST00000166899.2	ENSRNOT00000091672.1
Mouse	M18	Lipo3	Lipo5	M	9.1	2.2	138.4	5.8	20.6	473.6	1	1	13	3.2	4.6	36.5	Rattus norvegicus	ENSMUSG00000024766.14_ENSMUST00000025694.6	ENSMUSG00000086875.1_ENSMUST00000156818.1	ENSRNOT00000035013.4
Mouse	M20	Rex2	Zfp980	C	25	25.1	368.4	34.7	41.7	1383.6	0	0	5.6	0	0	26	Rattus norvegicus	ENSMUSG00000067919.8_ENSMUST00000075775.5	ENSMUSG00000058186.13_ENSMUST00000180014.1	ENSRNOT00000081537.1
Mouse	M23	Zfp984	Zfp982	C	0	14.3	168.8	10.6	35.1	692.2	0	0	6.8	0	1.1	23.2	Rattus norvegicus	ENSMUSG00000078495.10_ENSMUST00000105734.9	ENSMUSG00000078496.9_ENSMUST00000063704.7	ENSRNOT00000034746.6
Mouse	M24	Vmn1r205	Vmn1r203	C	24.3	11.5	225.6	20.9	15.1	596.4	0	1.9	3.6	0	1	11.4	Mus pahari	ENSMUSG00000100296.1_ENSMUST00000185475.1	ENSMUSG00000069289.1_ENSMUST00000091729.1	MGP_PahariEiJ_T0040451.1
Mouse	M26	Igkv14-100	Gm17472	C	8.7	7.1	83.2	8.3	11.9	213.8	0	1.1	8.3	0	1.1	20.2	Rattus norvegicus	ENSMUSG00000096515.5_ENSMUST00000199510.4	ENSMUSG00000091008.1_ENSMUST00000167638.1	ENSRNOT00000087773.1
Mouse	M27	Pcdhb9	Pcdhb7	M	74.4	49.5	696	43.5	49.8	1620	0.8	1.6	5.4	0	1.5	11.1	Microtus ochrogaster	ENSMUSG00000051242.1_ENSMUST00000057228.1	ENSMUSG00000045062.4_ENSMUST00000053037.4	ENSMOCT00000026210.1
Mouse	M28	Frat1	Frat3	C	0	22.1	141.8	0	11.5	305.2	0	1	14.2	0	1.1	30.8	Nannospalax galili	ENSMUSG00000067199.4_ENSMUST00000087155.4	ENSMUSG00000070526.2_ENSMUST00000094339.2	ENSNGAT00000028350.1
Zebrafish	Z02	si:dkey-62k3.5	NA	N	0	0	24.2	1	0	107.8	0	0	7.8	0	0	23.6	Oreochromis niloticus	ENSDARG00000090975.3_ENSDART00000173980.1	ENSDARG00000103701.1_ENSDART00000164831.1	XP_025757774.1
Zebrafish	Z04	si:ch211-108d22.1	si:ch211-134c9.2	N	0	0	8.7	0	0	42.3	0	1.3	12.3	0	1	31.2	Cyprinus carpio	ENSDARG00000097099.1_ENSDART00000154470.1	ENSDARG00000095593.1_ENSDART00000137138.1	XP_018956261.1
Zebrafish	Z05	si:dkey-151g22.1	Si:rp71-7l19.2	N	1	3	160	2	5	452	0	2	7.9	6	1	25.1	Cyprinus carpio	ENSDARG00000102028.1_ENSDART00000123408.2	ENSDARG00000102853.1_ENSDART00000064309.3	XP_018942195.1
Zebrafish	Z06	HTRA2	HTRA2	C	4.1	0	132.3	6.9	0	401.7	3.3	0	12.2	0	0	25.4	Ictalurus punctatus	ENSDARG00000092625.2_ENSDART00000132116.2	ENSDARG00000092202.2_ENSDART00000164973.1	ENSIPUT00000009250.1
Zebrafish	Z07	HTRA2	si:dkey-84o3.6	C	4.2	0	152.4	4.9	0	333.6	0	0	19.8	0	0	40.2	Ictalurus punctatus	ENSDARG00000095545.2_ENSDART00000147176.1	ENSDARG00000094878.2_ENSDART00000134520.2	ENSIPUT00000009250.1
Zebrafish	Z09	si:dkey-112g5.16	si:dkey-112g5.12	N	1.4	4.2	167.8	5.5	1	354.2	0	0	16.2	1	2.1	57.4	Ictalurus punctatus	ENSDARG00000095444.1_ENSDART00000131264.1	ENSDARG00000093963.2_ENSDART00000143783.2	ENSIPUT00000009250.1
Zebrafish	Z11	si:dkey-62k3.5	NA	N	1	0	46.8	3	0	184.2	0	0	12.2	0	0	38.8	Oreochromis niloticus	ENSDARG00000090975.3_ENSDART00000173980.1	ENSDARG00000099246.1_ENSDART00000169655.1	XP_025757774.1
Zebrafish	Z13	si:dkey-93l1.6	si:dkeyp-67e1.3	C	1.1	0	69.6	1.9	9.2	179.4	0	0	27.4	1	5.4	73	Cyprinus carpio	ENSDARG00000092512.1_ENSDART00000143001.1	ENSDARG00000091890.1_ENSDART00000134166.1	XP_018949576.1
Zebrafish	Z14	zgc:123103	si:zfos-1897c11.1	N	0	18.1	167.4	0	10	465.6	0	0	6.2	0	0.9	17.8	Ictalurus punctatus	ENSDARG00000099200.1_ENSDART00000162837.1	ENSDARG00000077910.4_ENSDART00000160532.1	ENSIPUT00000032654.1
Zebrafish	Z15	si:ch211-152f2.3	si:ch211-1f22.12	C	7.4	8	182.8	20.4	16.6	546.2	3.6	3.6	31.6	1	3.1	61.4	Sinocyclocheilus grahami	ENSDARG00000043445.5_ENSDART00000035575.6	ENSDARG00000093845.3_ENSDART00000152711.1	XP_016119820.1
Zebrafish	Z20	si:ch211-214k5.3	si:ch211-214k5.3	C	2	4.5	40.4	7.2	10.3	160.6	1.3	0	29.4	4.1	3.1	63.6	Sinocyclocheilus anshuiensis	ENSDARG00000043894.5_ENSDART00000064459.5	ENSDARG00000102034.1_ENSDART00000037303.5	XP_016341397.1
Zebrafish	Z21	ftr72	ftr90	N	18.1	27.7	309.1	33.7	33.3	878.9	0	2.1	12.9	0	1.3	35.1	Sinocyclocheilus rhinocerous	ENSDARG00000026704.6_ENSDART00000099302.3	ENSDARG00000097373.2_ENSDART00000154230.2	XP_016407654.1
Zebrafish	Z22	fhit	si:ch211-63i20.3	C	0	5.6	78	1.9	3.9	192	0	0	8.3	0	0	23.2	Cyprinus carpio	ENSDARG00000078195.2_ENSDART00000110845.2	ENSDARG00000104993.2_ENSDART00000159425.2	XP_018967896.1
Zebrafish	Z23	clca1	si:ch211-116o3.3	C	6.8	14	158	19.9	25.7	445	0	0	9	0.9	2	28.5	Ctenopharyngodon idella	ENSDARG00000100941.1_ENSDART00000159757.1	ENSDARG00000086498.3_ENSDART00000154635.1	CI01000308_00041387_00048067
Zebrafish	Z25	si:dkey-103d23.3	si:busm1-105l16.2	M	5.3	7.6	84.4	5	6	233.6	0.9	0	21.1	1	3.6	61.4	Sinocyclocheilus rhinocerous	ENSDARG00000095057.2_ENSDART00000141318.1	ENSDARG00000070858.4_ENSDART00000158955.1 ENSDARG00000043735.6_ENSDART00000064221.4 ENSDARG00000074395.2_ENSDART00000101794.3	XP_016375730.1
Zebrafish	Z27	si:ch211-132b12.3	si:ch211-132b12.4	N	10.1	8	86.1	8.3	11.4	207.9	0	0	9.6	0	1.3	20.4	Ctenopharyngodon idella	ENSDARG00000068363.5_ENSDART00000167002.1	ENSDARG00000092930.1_ENSDART00000146262.1	CI01000028_05937526_05949610
Zebrafish	Z30	actn3b	zgc:165653	C	5	18.1	47.6	0	4.1	144.4	1.1	0	20.2	0	4.3	53.4	Eptatretus burgeri	ENSDARG00000001431.10_ENSDART00000001649.9	ENSDARG00000104713.1_ENSDART00000168441.1	ENSEBUT00000022154.1
Zebrafish	Z31	zgc:165555	si:dkey-23a13.12	C	6.1	4.6	20.8	0	3.1	51.2	7	2.1	33.9	0	11.8	78.6	Tetraodon nigroviridis	ENSDARG00000101249.2_ENSDART00000110813.3	ENSDARG00000105342.1_ENSDART00000172959.1	ENSTNIG0000000877
Fruitfly	F01	CSNK2B	CSNK2B	M	0	0	108.4	0.9	0	305.6	0	0	15.2	0	0	41.8	Lasius niger	FBgn0053236	FBgn0053242	KMQ81491.1
Fruitfly	F02	NA	NA	C	4.1	4.1	141.4	5.1	6.1	311.6	0	0	16	0	0	41	Drosophila sechellia	FBgn0262610	FBgn0262575	FBgn0167536
Ds_CO	Number of synonymous differences in the common frame region in the original copy
Ds_CD	Number of synonymous differences in the common frame region in the derived bcopy
Ls_C	Number of synonymous sites in the common frame region
Da_CO	Number of nonsynonymous differences in the common frame region in the original copy
Da_CD	Number of nonsynonymous differences in the common frame region in the derived bcopy
La_C	Number of nonsynonymous sites in the common frame region
Ds_FO	Number of synonymous differences in the frameshifted region in the original copy
Ds_FD	Number of synonymous differences in the frameshifted region in the derived bcopy
Ls_F	Number of synonymous sites in the frameshifted region
Da_FO	Number of nonsynonymous differences in the frameshifted region in the original copy
Da_FD	Number of nonsynonymous differences in the frameshifted region in the derived bcopy
La_F	Number of nonsynonymous sites in the frameshifted region
